1        **Retinal ganglion cell survival after severe optic nerve injury is**  
2        **modulated by crosstalk between JAK/STAT signaling and innate**  
3        **immune responses in the zebrafish retina**  
4  
5  
6

7        **Si Chen<sup>1,2,3</sup>, Kira L. Lathrop<sup>2,4</sup>, Takaaki Kuwajima<sup>2,5\*</sup>, Jeffrey M. Gross<sup>2,5\*</sup>**  
8

9        1. *Eye Center of Xiangya Hospital, Central South University, 410008, Changsha,*  
10        *Hunan, P.R. China,*

11  
12        2. *Department of Ophthalmology, The University of Pittsburgh School of Medicine,*  
13        *Pittsburgh, PA 15213, USA,*

14  
15        3. *Hunan Key Laboratory of Ophthalmology, 410008, Changsha, Hunan, P.R. China,*

16  
17        4. *Department of Bioengineering, University of Pittsburgh Swanson School of*  
18        *Engineering, Pittsburgh, Pennsylvania, United States of America.*

19  
20        5. *Department of Developmental Biology, Louis J. Fox Center for Vision Restoration,*  
21        *The University of Pittsburgh School of Medicine, Pittsburgh, PA 15213, USA,*  
22

23  
24        Authors for correspondence (grossjm@pitt.edu; kuwajima@pitt.edu)  
25  
26  
27  
28

29 **ABSTRACT:**

30  
31 Visual information is transmitted from the eye to the brain along the optic nerve, a  
32 structure composed of retinal ganglion cell (RGC) axons. The optic nerve is highly  
33 vulnerable to damage in neurodegenerative diseases like glaucoma and there are  
34 currently no FDA-approved drugs or therapies to protect RGCs from death. Zebrafish  
35 possess remarkable neuroprotective and regenerative abilities and here, utilizing an optic  
36 nerve transection (ONT) injury and an RNA-seq-based approach, we identify genes and  
37 pathways active in RGCs that may modulate their survival. Through pharmacological  
38 perturbation, we demonstrate that JAK/STAT pathway activity is required for RGC  
39 survival after ONT. Furthermore, we show that immune responses directly contribute to  
40 RGC death after ONT; macrophages/microglia are recruited to the retina and blocking  
41 neuroinflammation or depleting these cells after ONT rescues survival of RGCs. Taken  
42 together, our results support a model in which pro-survival signals in RGCs, mediated by  
43 JAK/STAT signaling, counteract the activity of innate immune responses to modulate  
44 RGC vulnerability and resilience in the zebrafish retina after severe optic nerve damage.

45

46

47

48

49

50

51

52

53

54

55

56

57

58

59 **INTRODUCTION:**

60  
61 Visual information is transmitted from the eye to the brain along the optic nerve  
62 (ON), a structure composed of retinal ganglion cell (RGC) axons. The ON is highly  
63 vulnerable to damage and is compromised after acute injury and in neurodegenerative  
64 diseases such as glaucoma. In glaucoma, RGC axons are the initial site of injury; this  
65 causes the RGCs to die and ultimately results in irreversible loss of visual function.  
66 Neuroprotective strategies for glaucoma treatment seek to maintain the health of RGCs  
67 even after axons have been damaged, or to prevent initial damage to the RGC axon itself  
68 (Almasieh et al., 2012; Chang and Goldberg, 2012). There has been substantial progress  
69 in identifying the molecular and cellular events that lead to RGC death in the  
70 glaucomatous eye (Almasieh et al., 2012; Chang and Goldberg, 2012; Syc-Mazurek and  
71 Libby, 2019); however, no FDA-approved therapies currently exist to protect RGCs from  
72 death. This highlights the critical need for new neuroprotective strategies that preserve  
73 RGCs during glaucoma or after acute ocular trauma.

74  
75 Most RGCs die in mammals suffering from glaucoma or acute ocular trauma. For  
76 example, in mouse, ~65% of RGCs are lost within 7 days of optic nerve injury (ONI), and  
77 >90% by 28 days (Li et al., 2020). Mammals are also unable to regenerate RGCs after  
78 ONI, leading to irreparable vision loss. Unlike mammals, zebrafish possess remarkable  
79 neuroprotective and regenerative capacity in the central nervous system (Cigliola et al.,  
80 2020; Lahne et al., 2020). When the ON is damaged by crush or transection, zebrafish  
81 mount a robust regenerative response and regenerate RGC axons, restoring visual  
82 connections and function (Diekmann et al., 2015; Dhara et al., 2019). Moreover, it has

83 been reported that ~75% of zebrafish RGCs are protected from death after ONI, even to  
84 7-weeks post-injury (Zou et al., 2013), but the mechanisms underlying neuroprotection  
85 are unknown. With an interest in developing novel strategies to preserve RGCs during  
86 glaucoma and other trauma, here, we identify potential neuroprotective factors/pathways  
87 in zebrafish that mediate RGC survival after ONI.

88



89 **MATERIALS AND METHODS:**

90

91 **Animals**

92 Zebrafish (*Danio rerio*) in this study were 3-5 months old with an equal number of males  
93 and females used in all experiments. Transgenic lines used are *isl2b*:GFP (Pittman et al.,  
94 2008) and *mpeg1*:mCherry (Ellett et al., 2011); a gift from Dr. Neil Hukriede, University of  
95 Pittsburgh. Animals were maintained under standard conditions at 28.5 C on a 14h  
96 light/10 h dark cycle. There were no differences in outcomes based on gender of the fish  
97 and therefore all data were combined for analyses. All animals were treated in  
98 accordance with provisions established by the University of Pittsburgh School of Medicine  
99 Institutional Animal Care and Use Committee. Biological replicates (Ns) are provided in  
100 Figure legends for each experiment. At least three independent biological replicates were  
101 used per experiment.

102

103 **Optic nerve transection**

104 Optic nerve transection (ONT) was performed as previously described (Elsaedi et al.,  
105 2014; Zou et al., 2013). Zebrafish were anesthetized in 0.03% tricaine buffer (MS-222;  
106 Fisher Scientific) and placed on a moist tissue paper under a dissecting scope (Leica  
107 E65S). ONT surgery was performed on the left eye. After removal of the connective  
108 tissue, the eyeball was pulled out from the orbit gently using forceps. The ON and  
109 ophthalmic artery that runs along with the ON were exposed and the ON was then  
110 completely transected with another forcep, after which the eye was placed back in the  
111 orbit. Any animals where bleeding was observed were euthanized and not used for  
112 analysis. The right eye was subjected to a sham surgery as control: connective tissue

113 was removed, the eye was pulled out from the orbit gently, and then placed back in the  
114 orbit. Fish were returned to system water in separate tanks to recover.

115

### 116 **RGC isolation and fluorescence-activated cell sorting (FACS)**

117 Retinae were harvested from *isl2b*:GFP zebrafish at 12 and 24 hours post-injury (hpi) in  
118 biological triplicate. Four retinae were collected per sample. For retinal isolations and cell  
119 dissociation, animals were euthanized by tricaine overdose and transferred to PBS for  
120 enucleation. To achieve single cell suspension, the eyeball was rinsed in 1X PBS post-  
121 enucleation and incubated in StemPro™ Accutaset™ Cell Dissociation Reagent (Thermo  
122 Fisher, #A1110501) at 28.5 C for 40min in a water bath. The cell suspension was then  
123 passed through a 70µm cell strainer (Fisher Scientific) and gently pelleted by  
124 centrifugation at 4500rpm for 5min at 4C. After two washes in ice cold 1X PBS, cells  
125 were resuspended in ice cold 5% FBS in 1X PBS. GFP<sup>+</sup> cells were sorted using a FACS  
126 Aria IIu cell sorter (BD Biosciences) at the Flow Cytometry Core at the University of  
127 Pittsburgh School of Medicine Department of Pediatrics. The gate for FACS was set by  
128 GFP intensity for both injured (ONT) and intact (control) *isl2b*:GFP samples. The same  
129 gating settings were used for both the ONT and control RGC samples and for all biological  
130 replicates.

131

### 132 **RNA-seq and bioinformatics analyses**

133 Library preparation, quality control analysis, and next generation sequencing were  
134 performed by the Health Sciences Sequencing Core at Children's Hospital of Pittsburgh  
135 as previously described (Leach et al., 2020). cDNA sequencing libraries were prepared

136 using a SmartSeq HT kit (Takara Bio) and Illumina Nextera XT kit (Illumina Inc.). 2 X 75  
137 paired-end, 150 cycle sequencing was performed on a NextSeq 500 system (Illumina  
138 Inc.), aiming for 40 million reads per sample. Raw read and processed data files are  
139 available in GEO: GSE171426. After sequencing, raw read data were imported to the  
140 CLC Genomics Workbench (Qiagen Digital Insights) licensed through the Molecular  
141 Biology Information Service of the Health Sciences Library System at the University of  
142 Pittsburgh. After mapping trimmed reads to the *Danio rerio* reference genome (assembly  
143 GRCz11), differentially expressed genes (DEG) from the 24hpi time point were identified  
144 using the following filter: the maximum of the average group RPKM value >1.5, absolute  
145 fold change >2, false discovery rate (FDR) p-value <0.05. Genes with TPM=0 in one or  
146 more replicates were excluded. This filtering strategy was also used for DEG at 12hpi and  
147 a second analysis was performed where the FDR p-value <0.05 was switched to a p-  
148 value <0.05. Pathway enrichment analyses were performed using DAVID Bioinformatics  
149 Resources 6.8 (<https://david.ncifcrf.gov>) and using the KEGG database.

150

## 151 **Pharmacological experiments**

152 To assess toxicity and efficacy, the JAK inhibitor, Pyridone 6 (P6), or dexamethasone  
153 (both Sigma-Aldrich) was intravitreally (IV) injected into the intact and injured retina at  
154 several different concentrations, as previously described (Elsaeidi et al., 2014), and RGC  
155 survival was quantified. Based on (Elsaeidi et al. 2014; Bollaerts et al. 2019), 5uM P6 and  
156 10uM dexamethasone were utilized. The first dose of each compound (2µL) was injected  
157 immediately after ONT (0dpi) and the second dose (2µL) was injected at 1dpi. 2µl of  
158 0.05% DMSO was injected for all control doses. To deplete macrophages/microglia, fish

159 were immersed in 500nM PLX3397 (Fisher Scientific) in system water, as previously  
160 described (Kanagaraj et al., 2020). PLX3397 exposure started 1 day before ONT and  
161 system water containing PLX3397 was replaced daily during the experiment.

162

### 163 **Immunohistochemistry**

164 Immunofluorescence staining on retinal cryosections and flat-mounted retinae were  
165 performed as previously described (Uribe and Gross, 2007; Zou et al., 2013) with the  
166 addition of an antigen retrieval step consisting of 100% methanol incubation at -20 C for  
167 30 minutes for staining pSTAT3 (MBL International Corporation, D128-3). For retinal flat-  
168 mounts, after euthanasia, fish were decapitated and heads were fixed in 4%  
169 paraformaldehyde (PFA) at 4C overnight. The retina was dissected in ice cold PBS,  
170 washed in 0.1% PBST (Triton X-100 in PBS), and then incubated in a 1.5 ml tube on a  
171 rotator overnight at 4C with 4C4 (1:200, a kind gift of Dr. Peter Hitchcock, University of  
172 Michigan School of Medicine; Craig et al., 2008), pSTAT3 (1:100, MBL), cleaved caspase  
173 3 (1:200, Abcam, ab13847) and mCherry (1:200, Takara Bio USA Inc./Clontech  
174 Laboratories, 632543). Retinae were then washed in 0.1% PBST for 3 x 10 minutes at  
175 room temperature and incubated with goat-anti mouse Cy3 (1:250, Jackson  
176 ImmunoResearch Labs, 115-165-166) or goat-anti rabbit Alexa 647 (1:500, Cell Signaling  
177 Technology, 8940) secondary antibody for 3 hours at room temperature. Samples were  
178 then washed with 0.1% PBST for 3 X 10 minutes and carefully cut into 4 quadrants and  
179 mounted on slides with DAPI Vectashield (Vector Laboratories, H-1200). For  
180 cryosections, samples were prepared as previously described (Uribe and Gross, 2007);

181 zn-8 (Zebrafish International Resource Center) was used at a 1:200 dilution and all other  
182 antibodies were used at the same concentrations as for the retinal flat-mount.

183

### 184 **BrdU Incorporation assays**

185 Adult *isl2b*:GFP+ fish were immersed in 10mM BrdU (Sigma Aldrich) dissolved in system  
186 water for from 6dpi to 7dpi, and sacrificed at 7dpi. As a positive control for BrdU  
187 incorporation and immunohistochemistry, a needle poke injury was performed after  
188 (Fausett and Goldman, 2006) and fish were exposed to BrdU for 24 hours prior to being  
189 sacrificed. Immunohistochemistry for BrdU proceeded as described above for other  
190 antibodies, with the addition of a 10min incubation of 4N HCl at 37C to relax chromatin.  
191 anti-BrdU (Abcam, ab6326) was used at 1:200 dilution.

192

### 193 **Confocal microscopy, image processing and quantification**

194 For *isl2b*:GFP imaging, retinal flat-mounts were prepared as above, with the head fixed  
195 in 4% PFA overnight at 4C and the retina dissected and mounted on the second day.  
196 Images were taken using Olympus Fluoview FV1200 laser scanning microscope  
197 (Olympus Corporation). Images were taken from each of the 4 quadrants (1 peripheral, 1  
198 central per quadrant) at 40X magnification. Quantification of RGC numbers was  
199 performed using particle analysis in ImageJ after setting up a consistent threshold for all  
200 images. RGC survival was calculated as the ratio of *isl2b*:GFP+ RGCs in the left (ONT+)  
201 eye/ *isl2b*:GFP+ RGCs in the right (ONT- control) eye of the same fish.

202

203 Quantification of macrophages/microglia was performed using Imaris 9.6.0  
204 (Bitplane). Confocal images were first converted into Imaris files, 3D rendered surfaces  
205 were then created for mCherry or 4C4 using the same algorithm (smoothing = 0.4 $\mu$ M,  
206 absolute intensity threshold = 1560, objects area > 50 $\mu$ M<sup>2</sup>) for each dataset.  
207 Quantification of total surface area and sphericity was performed using Imaris.  
208 Measurements were exported and statistically assessed using Prism 9.0 (Graphpad).

209

210 For GFP fluorescence intensity quantification, the GFP signal intensity of 30  
211 random cells in the ONT+ and ONT- retina per fish (N=6) was collected using Fiji ImageJ  
212 and the corrected total cell fluorescence (CTCF) was obtained (after L. Hammond, 2014,  
213 *Measuring cell fluorescence using ImageJ*, The University of Queensland, Australia,  
214 [https://theolb.readthedocs.io/en/latest/imaging/measuring-cell-fluorescence-using-](https://theolb.readthedocs.io/en/latest/imaging/measuring-cell-fluorescence-using-imagej.html)  
215 [imagej.html](https://theolb.readthedocs.io/en/latest/imaging/measuring-cell-fluorescence-using-imagej.html)). Briefly, using the freehand tool in ImageJ, single RGCs were outlined as a  
216 region of interest (ROI) and GFP intensity was measured as was as the fluorescence of  
217 the background for every retina. CTCF was then calculated as follows: Integrated Density  
218 – (Area of selected cell X Mean fluorescence of background readings). Relative intensity  
219 was calculated as the ratio of the CTCF in ONT+ RGCs divided by that of ONT- RGCs.

220

221 Localization of pSTAT3 expression to RGCs was confirmed with surface creation in  
222 Imaris 9.6.0. Quantification of pSTAT3 levels was performed as described (Osborne et  
223 al. 2018) using FIJI. Briefly, *isl2b*:GFP labeling was used to identify the location and depth  
224 of the ganglion cell layer (GCL). RGC volumes were converted to Z-projections and  
225 background subtraction and speckle removal was performed on all images. Threshold

226 levels for pSTAT3 were determined from ONT- samples and consistent thresholds were  
227 then applied to all images in ONT+ samples and integrated density was measured. The  
228 expression level of pSTAT3 was calculated as the ratio of the average integrated density  
229 of pSTAT3 in 1dpi, 7dpi, P6/1dpi, or P6/7dpi retinae to the average integrated density of  
230 the contralateral ONT- eye.

231

### 232 **Statistics**

233 All statistical analyses were performed using Prism 9.0 (Graphpad). Data were presented  
234 as mean $\pm$ SD, with the exception of cleaved caspase-3 images which show mean $\pm$ -  
235 SEM. For multiple comparisons, Kruskal-Wallis ANOVA followed by Dunn's multiple  
236 comparisons tests between groups were performed. For comparisons between two  
237 groups, non-parametric Mann-Whitney tests were performed, with the exception of  
238 sphericity comparison in which an unpaired t-test with Welch's correction was performed.  
239 P-values, sample sizes, and statistical analyses for each experiment are included in the  
240 figure legends.

241

242 **RESULTS AND DISCUSSION:**

243 **Zebrafish retain the majority of RGCs after ONT**

244 To enable isolation of RGCs after injury, we first verified that GFP remained  
245 expressed in RGCs of adult *isl2b*:GFP fish (Pittman et al., 2008). In retinal cryosections,  
246 *isl2b*:GFP cells co-labeled with DAPI and the RGC-specific marker, zn-8 (Larison and  
247 Bremiller, 1990), and  $64.86 \pm 8.44\%$  of cells within the GCL were *isl2b*:GFP<sup>+</sup> (Fig. 1A).

248  
249 To create an ON injury, we performed optic nerve transection (ONT). Injured  
250 retinae from the left eye (ONT+) and sham surgery retinae from the right eye (ONT-) were  
251 collected 1, 3, 7, or 14 days post injury (dpi) (Fig. 1B). We confirmed that there were no  
252 differences in cell number between the uninjured left and right eye (S. Chen; *data not*  
253 *shown*). To quantify RGC survival after ONT, we counted *isl2b*:GFP<sup>+</sup> RGCs from eight  
254 regions (four in the peripheral retina and four in the central retina (Fig. 1B)), then divided  
255 counts from the ONT+ retina by those from the ONT- retina of the same fish. RGC survival  
256 was  $94.44 \pm 5.45\%$  at 1dpi and  $92.52 \pm 3.54\%$  at 3dpi; however, survival decreased to  
257  $76.35 \pm 2.58\%$  at 7dpi ( $p=0.0009$ ). At 14dpi, RGC numbers recovered to  $98.71 \pm 4.82\%$  (Fig.  
258 1C,D).

259  
260 *isl2b*:GFP intensity in ONT+ RGCs declined by  $40.43 \pm 9.99\%$  at 7dpi relative to  
261 ONT- RGCs ( $p<0.0001$ ), raising the possibility that GFP intensity was falling below the  
262 detection threshold after ONT due to compromised health and not death of *isl2b*:GFP<sup>+</sup>  
263 RGCs. Cleaved caspase 3 immunostaining revealed that  $12.44 \pm 1.79\%$  of RGCs in the  
264 ONT+ retinae were caspase 3<sup>+</sup> at 7dpi, compared to  $0.06 \pm 0.01\%$  of RGCs in the ONT-



265 retina (Fig. S1). Moreover, no BrdU<sup>+</sup> cells were detected in the GCL of ONT<sup>+</sup> retinæ at 7  
266 dpi, indicating that RGCs had not yet regenerated (S. Chen, *data not shown*). Taken  
267 together, these data indicate that, despite transient reduction in *isl2b*:GFP levels and  
268 limited death, most *isl2b*:GFP<sup>+</sup> RGCs are indeed preserved in zebrafish after ONT.

269

## 270 **Identification of neuroprotective factors and pathways after ONT**

271 To identify neuroprotective signals/pathways in RGCs, *isl2b*:GFP<sup>+</sup> RGCs were  
272 FACS-isolated from ONT<sup>+</sup> and ONT<sup>-</sup> retinæ at 24hpi and utilized for RNA-seq (Fig 2A).  
273 We identified 308 differentially expressed genes (DEGs) (Fig. 2B), of which 56 were  
274 upregulated and 252 were downregulated (Tables S1,2). We reasoned that  
275 neuroprotective factors would be upregulated upon ONT, and the upregulated DEG group  
276 included *stat3*, *irf9*, *sox11b*, *lepr*, and *socs3b*, which encode components/regulators of  
277 the JAK/STAT signaling pathway (Fig. 2C; (Villarino et al., 2015)), in addition to other  
278 neuroprotective and pro-regenerative genes such as *gap43* (Chung et al., 2020), *atf3*  
279 (Kole et al., 2020), and *atoh7* (Brodie-Kommit et al., 2021). Moreover, the interferon  
280 regulatory factor genes, *irf9* and *irf1b* (Langevin et al., 2013), and the chemokine receptor,  
281 *cxcr4b* (García-Cuesta et al., 2019), were also upregulated, suggesting activation of  
282 innate immune responses in RGCs after ONT. Pathway enrichment analyses indicated  
283 that JAK/STAT signaling was the most highly enriched pathway in RGCs after ONT (Fig.  
284 2D). Furthermore, DEGs associated with the adipocytokine signaling pathway, which  
285 regulates STAT3-mediated signals (Kadye et al., 2020), were also enriched in RGCs after  
286 ONT (Fig. 2D). Downregulated DEGs revealed that neuroactive ligand receptor

287 interactions, MAPK, and calcium signaling pathways were all significantly changed after  
288 ONT (Fig. 2D).

289  
290 We also investigated gene expression changes at 12hpi. Using the same selection  
291 criteria as for 24hpi analyses yielded limited numbers of DEGs at 12hpi, with 5  
292 upregulated and 3 downregulated (Table S3). Amongst these upregulated DEGs,  
293 however, was the leukocyte recruitment cytokine, *cxc12b* (García-Cuesta et al., 2019),  
294 whose receptor, *cxcr4b*, was upregulated at 24hpi. Relaxing our selection criteria from an  
295 FDR p-value <0.05 to a p-value <0.05 revealed 49 upregulated and 31 downregulated  
296 DEGs (Tables S4,5). *stat3* and *socs3b* were amongst the upregulated group, as was the  
297 pro-inflammatory cytokine, *il1b* (Hasegawa et al., 2017), further suggesting activation of  
298 the JAK/STAT and innate immune pathways in RGCs after ONT.

299

### 300 **JAK/STAT pathway activity is required for RGC survival after ONT**

301 JAK/STAT activity contributes to RGC survival in multiple injury contexts (Boyd et al.,  
302 2003; Huang et al., 2007; Luo et al., 2007) and facilitates ON and retinal regeneration  
303 (Elsaeidi et al., 2014; Kassen et al., 2009; Leibinger et al., 2013; Mehta et al., 2016; Park  
304 et al., 2004; Todd et al., 2016; Zhao et al., 2014). To confirm JAK/STAT pathway  
305 activation after ONT, we assessed phosphorylated-STAT3 (pSTAT3) levels in ONT+ and  
306 ONT- retinae (Fig. 3A; Movie S1). pSTAT3 levels were significantly increased in ONT+  
307 RGCs (Fig. 3B;  $p < 0.01$ ), supporting the notion that Stat3 may be neuroprotective after  
308 ONT. To determine whether JAK/STAT pathway activity is required for RGC survival after  
309 ONT, we performed intravitreal (IV) injections of a pan-Jak inhibitor, Pyridone 6 (P6), or  
310 0.05% DMSO at the time of ONT and again at 1dpi (Fig. 3C). P6-injection resulted in

311 significant reductions to pSTAT3 levels in ONT+ RGCs at 1dpi and 7dpi, supporting the  
312 efficacy of P6 in blocking Jak activation in zebrafish (Fig. 3D,E). We next quantified  
313 *isl2b*:GFP<sup>+</sup> RGC survival at 7dpi when Jak activity was impaired (Fig. 3F,G). DMSO had  
314 no effect on RGC survival, nor did P6 alone ( $p=0.4796$ ; Fig. 3G). However, IV P6 injection  
315 in conjunction with ONT resulted in a significant reduction in RGC survival to  $39.44\pm 6.99\%$   
316 ( $p<0.0001$ ). These data demonstrate a role for JAK/STAT pathway activity in protecting  
317 zebrafish RGCs after ONT.

318

### 319 **Innate immune response involvement after ONT**

320 After ONI, the effects of injury-activated immune responses are varied. In some  
321 contexts, immune responses stimulate the recruitment and activation of leukocytes that  
322 generate secondary signals to modulate RGC survival and death pathways (Bariş and  
323 Tezel, 2019; Mac Nair et al., 2016; Nadal-Nicolás et al., 2017; Williams et al., 2017), while  
324 in others, the stimulation of limited neuroinflammation induces pro-survival and  
325 regenerative responses (Kanagaraj et al., 2020; Todd et al., 2019). In zebrafish, leukocyte  
326 activity accelerates axonal regeneration after neuronal damage (Tsarouchas et al., 2018),  
327 including in RGCs after ON crush (Van Dyck et al., 2021). Immune response-related  
328 genes were upregulated in *isl2b*:GFP<sup>+</sup> RGCs after ONT (Fig. 2) and therefore we  
329 investigated how components of the innate immune system respond to ONT in zebrafish  
330 and whether they contribute to RGC vulnerability. We focused on macrophages/microglia,  
331 leukocytes that accumulate in the zebrafish retina after a variety of injury types and  
332 facilitate repair and regeneration (Leach et al., 2020; White et al., 2017). In zebrafish, the  
333 4C4 antibody recognizes an unidentified protein expressed by macrophages/microglia

334 (Craig et al., 2008). Consistent with other reports (Mitchell et al., 2018), 4C4<sup>+</sup>  
335 macrophages/microglia were located throughout the ONT- retina, including in the GCL  
336 (Fig. 4A,B; Movie S2). At 1dpi, the number of 4C4<sup>+</sup> cells appeared to increase in the GCL  
337 (Fig. 4A,B). Similarly, utilizing *mpeg1*:mCherry transgenic fish (Ellett et al., 2011), we  
338 observed an apparent increase in mCherry<sup>+</sup> macrophages/microglia in the ONT+ GCL at  
339 1dpi (Fig. 4C). Due to morphology and close proximity in the ONT retinae, it was difficult  
340 to identify single macrophages/microglia for counting and therefore we quantified the  
341 percent area covered by mCherry<sup>+</sup> cells within the GCL (Fig. 4D). When compared to  
342 ONT- retinae, mCherry<sup>+</sup> cells covered nearly 6 times more GCL area after ONT  
343 ( $p=0.0006$ ; Fig. 4D). Macrophage/microglia morphologies change upon activation,  
344 whereby quiescent cells with a ramified morphology take on a more spherical/amoeboid  
345 shape when activated (Karlstetter et al., 2015; Mitchell et al., 2018). Morphological  
346 differences were evident in both 4C4<sup>+</sup> and mCherry<sup>+</sup> cells within the GCL of ONT+ retinae  
347 (Fig. 4B,C), and quantification of mCherry<sup>+</sup> cell sphericity revealed a significant increase  
348 at 1dpi (Fig. 4E;  $p<0.0001$ ); collectively, showing that macrophages/microglia accumulate  
349 in the GCL and become activated after ONT.

350

## 351 **Blocking inflammation or depletion of macrophages/microglia protects RGCs after** 352 **ONT**

353 Pro-inflammatory cytokines, interferon response factors, and leukocyte  
354 recruitment factors were upregulated in *isl2b*:GFP<sup>+</sup> RGCs post-ONT (Fig. 2C; Tables  
355 S1,S3,S4) and macrophages/microglia accumulate and become activated in the ONT+  
356 GCL (Fig.4 A-D). These data suggest that macrophage/microglia-mediated inflammation

357 might contribute to RGC death after ONT, in opposition to JAK/STAT-mediated  
358 neuroprotection. To test this hypothesis, we inhibited inflammation after ONT via  
359 dexamethasone treatment, a strategy shown to protect RGCs in other injury models  
360 (Bollaerts et al., 2019; Dutt et al., 2010; Gallina et al., 2015; Jovanovic et al., 2020), and  
361 quantified RGC survival. Experimentally, 2 $\mu$ L of 100 $\mu$ M dexamethasone or 0.05% DMSO  
362 (vehicle control) was IV injected into *isl2b*:GFP fish at the time of ONT and again at 1dpi  
363 and tissue was collected at 7dpi (after Fig. 3C). Dexamethasone alone had no effect on  
364 *isl2b*:GFP<sup>+</sup> RGC survival in the ONT- retina (96.56 $\pm$ 8.67%,  $p=0.5998$ ), but significantly  
365 increased survival of ONT+ RGCs at 7dpi, compared to DMSO controls (104.1 $\pm$ 13.35%,  
366  $p<0.05$ ; Fig. 4G). Dexamethasone-mediated inhibition of inflammation prevents the  
367 recruitment of macrophages/microglia in some contexts (Tsarouchas et al., 2018; White  
368 et al., 2017), but not others (Chatzopoulou et al., 2016; Warchol, 1999; Xie et al., 2019).  
369 Quantification of the percent of the GCL covered by *mpeg1*:mCherry<sup>+</sup>  
370 macrophages/microglia in DMSO- and dexamethasone-injected retinæ revealed no  
371 significant differences after ONT (Fig. 4H,  $p=0.0623$ ). Taken together, these data  
372 demonstrate that impairment of inflammation after ONT rescued RGC survival but didn't  
373 suppress the recruitment of macrophages/microglia to the GCL.

374

375 Previous reports have identified roles for microglia in contributing to RGC death  
376 after a variety of insults (Bosco et al., 2008; Jovanovic et al., 2020; Takeda et al., 2018).  
377 However, other studies have shown that microglia are dispensable for RGC survival after  
378 ON crush (Hilla et al., 2017), and may instead provide neuroprotective and/or pro-  
379 regenerative signals (Bell et al., 2018; Sappington et al., 2006). To directly test the

380 requirement of macrophages/microglia in modulating RGC death in zebrafish after ONT,  
381 we depleted macrophages/microglia using PLX3397, a potent inhibitor of the colony-  
382 stimulating factor 1 receptor (CSF1R). CSF1R activity is required for  
383 macrophage/microglia differentiation (Lin et al., 2008; Sherr et al., 1985) and PLX3397  
384 has been utilized effectively in zebrafish (e.g. Conedera et al., 2019; Leach et al., 2020;  
385 Van Dyck et al., 2021). Animals were immersed in 500nM PLX3397 one day prior to ONT  
386 and retinae were collected at 7dpi. To validate the efficiency of macrophage/microglia  
387 depletion by PLX3397, we quantified the percent area of the GCL occupied by  
388 *mpeg1:mCherry*<sup>+</sup> macrophages/microglia. PLX3397 significantly reduced the coverage of  
389 *mpeg1:mCherry*<sup>+</sup> cells in both the ONT- and ONT+ GCL (Fig. 4I,J). Similar to  
390 dexamethasone-mediated RGC protection (Fig. 4F,G), PLX3397-mediated depletion of  
391 macrophages/microglia also rescued RGC survival at 7dpi (103.49±12.01%, p<0.05; Fig.  
392 4I,K). Finally, we determined whether the neuroprotective effects mediated by JAK/STAT  
393 activity in RGCs after ONT were required in the absence of macrophages/microglia.  
394 PLX3397-mediated depletion of macrophages/microglia also rescued RGC survival at  
395 7dpi after JAK/STAT pathway inhibition using P6 (107.60±9.32%, p<0.05; Figs. 4K,S2),  
396 indicating that JAK/STAT activity is dispensable in the absence of macrophage/microglia  
397 recruitment.

398

399 Collectively, these data strongly support a model in which crosstalk between  
400 neurotoxic signals emanating from macrophages/microglia and JAK/STAT pathway  
401 activation in zebrafish RGCs regulates their survival after ONI. As noted above, Stat3  
402 upregulation has been associated with RGC survival in some experimental contexts

403 (Huang et al., 2007; Luo et al., 2007). Despite this, overall RGC survival is limited under  
404 physiological conditions, with over 90% of RGCs lost within 28 days after injury in mice  
405 (Li et al., 2020). This is not true for all mammals, however. Indeed, the naked mole-rat  
406 retains many RGCs after injury, to at least 28 days (Park et al., 2017). Interestingly, while  
407 pStat3 is nearly absent in mouse RGCs, even after injury, it increases significantly in  
408 mole-rat RGCs after ON crush, supporting a possible role for Stat3 activity in RGC  
409 neuroprotection.

410

411 Counter to our expectations, pSTAT3 localization was predominantly cytoplasmic  
412 in ONT+ RGCs, rather than nuclear (Fig. 3A, Movie S1). Interestingly, this observation is  
413 consistent with cytoplasmic pSTAT3 localization in the regenerating zebrafish retina  
414 (Elsaeidi et al., 2014) and in mouse motor neurons responding to cytokine stimulation  
415 (Selvaraj et al., 2012). Stat3 possesses transcription-independent functions such as  
416 cytoplasmically regulating autophagy (Shen et al., 2012). Stat3 also localizes to  
417 mitochondria after cytokine stimulation in mouse RGCs where it regulates metabolic  
418 functions and enhances axon regeneration after ONI (Luo et al., 2016). Thus, it is possible  
419 that the function of Stat3 in RGC neuroprotection could be transcription-independent.

420

421 Not all zebrafish RGCs survive ONT and caspase 3<sup>+</sup> RGCs appeared to be a non-  
422 random pattern in the ONT+ retina (Fig. S1). This may indicate that there are RGC  
423 subtype(s) that are more susceptible to ONI, similar to what has been observed in mice  
424 (Tran et al., 2019). RGC subtypes in zebrafish have been recently characterized (Kölsch  
425 et al., 2021) and additional studies will be required to determine if specific subtypes are

426 lost after ONT, and if so, whether these subtypes lack the ability to upregulate JAK/STAT  
427 activity after injury. Finally, it will be of interest to identify the signals emanating from  
428 macrophages/microglia that activate death and/or pro-survival pathways in zebrafish  
429 RGCs after injury, as these would also be promising targets around which neuroprotective  
430 therapies for glaucoma could be developed (García-Bermúdez et al., 2021; Rashid et al.,  
431 2019).



432 **ACKNOWLEDGEMENTS:**

433

434 The work described herein was supported by a grant from the BrightFocus Foundation  
435 National Glaucoma Research Program (G2020277) to JMG; an unrestricted grant from  
436 Xiangya Hospital of Central South University and China Scholar Council for studying in  
437 Pittsburgh to SC; NIH CORE Grant P30-EY08098 to the Department of Ophthalmology;  
438 the Eye & Ear Foundation of Pittsburgh, and an unrestricted grant from Research to  
439 Prevent Blindness, New York, NY. We're grateful to Dick Barrett and Ben Carr for  
440 technical assistance and to Dr. Hugh Hammer for expert zebrafish husbandry.

441 **LITERATURE CITED**

- 442 **Almasieh, M., Wilson, A. M., Morquette, B., Cueva Vargas, J. L. and Di Polo, A.**  
443 (2012). The molecular basis of retinal ganglion cell death in glaucoma. *Prog. Retin.*  
444 *Eye Res.* **31**, 152–181.
- 445 **Bariş, M. and Tezel, G.** (2019). Immunomodulation as a Neuroprotective Strategy for  
446 Glaucoma Treatment. *Curr Ophthalmol Rep* **7**, 160–169.
- 447 **Bell, K., Und Hohenstein-Blaul, N. von T., Teister, J. and Grus, F.** (2018).  
448 Modulation of the Immune System for the Treatment of Glaucoma. *Curr.*  
449 *Neuropharmacol.* **16**, 942–958.
- 450 **Bollaerts, I., Van Houcke, J., Beckers, A., Lemmens, K., Vanhunsel, S., De Groef,**  
451 **L. and Moons, L.** (2019). Prior Exposure to Immunosuppressors Sensitizes Retinal  
452 Microglia and Accelerates Optic Nerve Regeneration in Zebrafish. *Mediators*  
453 *Inflamm.* **2019** 6135795. <https://doi.org/10.1155/2019/6135795>
- 454 **Bosco, A., Inman, D. M., Steele, M. R., Wu, G., Soto, I., Marsh-Armstrong, N.,**  
455 **Hubbard, W. C., Calkins, D. J., Horner, P. J. and Vetter, M. L.** (2008). Reduced  
456 retina microglial activation and improved optic nerve integrity with minocycline  
457 treatment in the DBA/2J mouse model of glaucoma. *Invest. Ophthalmol. Vis. Sci.*  
458 **49**, 1437–1446.
- 459 **Boyd, Z. S., Kriatchko, A., Yang, J., Agarwal, N., Wax, M. B. and Patil, R. V.** (2003).  
460 Interleukin-10 Receptor Signaling through STAT-3 Regulates the Apoptosis of  
461 Retinal Ganglion Cells in Response to Stress. *Investigative Ophthalmology &*  
462 *Visual Science* **44**, 5206-5211.
- 463 **Brodie-Kommit, J., Clark, B. S., Shi, Q., Shiau, F., Kim, D. W., Langel, J., Sheely,**  
464 **C., Ruzycski, P. A., Fries, M., Javed, A., et al.** (2021). Atoh7-independent  
465 specification of retinal ganglion cell identity. *Sci Adv* **7**, 11 eabe4983.
- 466 **Chang, E. E. and Goldberg, J. L.** (2012). Glaucoma 2.0: neuroprotection,  
467 neuroregeneration, neuroenhancement. *Ophthalmology* **119**, 979–986.
- 468 **Chatzopoulou, A., Heijmans, J. P. M., Burgerhout, E., Oskam, N., Spaik, H. P.,**  
469 **Meijer, A. H. and Schaaf, M. J. M.** (2016). Glucocorticoid-Induced Attenuation of  
470 the Inflammatory Response in Zebrafish. *Endocrinology* **157**, 2772–2784.
- 471 **Chung, D., Shum, A. and Caraveo, G.** (2020). GAP-43 and BASP1 in Axon  
472 Regeneration: Implications for the Treatment of Neurodegenerative Diseases. *Front*  
473 *Cell Dev Biol* **8**, doi: 10.3389/fcell.2020.567537.
- 474 **Cigliola, V., Becker, C. J. and Poss, K. D.** (2020). Building bridges, not walls: spinal  
475 cord regeneration in zebrafish. *Dis. Model. Mech.* **13**, doi: 10.1242/dmm.044131
- 476 **Conedera, F. M., Pousa, A. M. Q., Mercader, N., Tschopp, M. and Enzmann, V.**

- 477 (2019). Retinal microglia signaling affects Müller cell behavior in the zebrafish  
478 following laser injury induction. *Glia* **67**, 1150–1166.
- 479 **Craig, S. E. L., Calinescu, A.-A. and Hitchcock, P. F.** (2008). Identification of the  
480 molecular signatures integral to regenerating photoreceptors in the retina of the  
481 zebrafish. *J. Ocul. Biol. Dis. Infor.* **1**, 73–84.
- 482 **Dhara, S. P., Rau, A., Flister, M. J., Recka, N. M., Laiosa, M. D., Auer, P. L. and**  
483 **Udvardia, A. J.** (2019). Cellular reprogramming for successful CNS axon  
484 regeneration is driven by a temporally changing cast of transcription factors. *Sci.*  
485 *Rep.* **9**, 14198.doi: 10.1038/s41598-019-50485-6.
- 486 **Diekmann, H., Kalbhen, P. and Fischer, D.** (2015). Characterization of optic nerve  
487 regeneration using transgenic zebrafish. *Front. Cell. Neurosci.* **9**, 118.doi:  
488 10.3389/fncel.2015.00118.
- 489 **Dutt, M., Tabuena, P., Ventura, E., Rostami, A. and Shindler, K. S.** (2010). Timing of  
490 corticosteroid therapy is critical to prevent retinal ganglion cell loss in experimental  
491 optic neuritis. *Investigative Ophthalmology & Visual Science* **51**, 1439–1445.
- 492 **Ellett, F., Pase, L., Hayman, J. W., Andrianopoulos, A. and Lieschke, G. J.** (2011).  
493 mpeg1 promoter transgenes direct macrophage-lineage expression in zebrafish.  
494 *Blood* **117**, e49–56.
- 495 **Elsaedi, F., Bemben, M. A., Zhao, X.-F. and Goldman, D.** (2014). Jak/Stat signaling  
496 stimulates zebrafish optic nerve regeneration and overcomes the inhibitory actions  
497 of Socs3 and Sfpq. *J. Neurosci.* **34**, 2632–2644.
- 498 **Fausett, B. V. and Goldman, D.** (2006). A Role for  $\alpha 1$  Tubulin-Expressing Müller Glia  
499 in Regeneration of the Injured Zebrafish Retina. *J. Neurosci.* **26**, 6303–6313.
- 500 **Gallina, D., Zelinka, C. P., Cebulla, C. M. and Fischer, A. J.** (2015). Activation of  
501 glucocorticoid receptors in Müller glia is protective to retinal neurons and  
502 suppresses microglial reactivity. *Exp. Neurol.* **273**, 114–125.
- 503 **García-Bermúdez, M. Y., Freude, K. K., Mouhammad, Z. A., van Wijngaarden, P.,**  
504 **Martin, K. K. and Kolko, M.** (2021). Glial Cells in Glaucoma: Friends, Foes, and  
505 Potential Therapeutic Targets. *Front. Neurol.* **12**, doi: 10.3389/fneur.2021.624983.
- 506 **García-Cuesta, E. M., Santiago, C. A., Vallejo-Díaz, J., Juarranz, Y., Rodríguez-**  
507 **Frade, J. M. and Mellado, M.** (2019). The Role of the CXCL12/CXCR4/ACKR3  
508 Axis in Autoimmune Diseases. *Front. Endocrinol.* **10**, doi:  
509 10.3389/fendo.2019.00585.
- 510 **Hasegawa, T., Hall, C. J., Crosier, P. S., Abe, G., Kawakami, K., Kudo, A. and**  
511 **Kawakami, A.** (2017). Transient inflammatory response mediated by interleukin-1 $\beta$   
512 is required for proper regeneration in zebrafish fin fold. *Elife* **6**,  
513 <https://doi.org/10.7554/eLife.22716>.

- 514 **Hilla, A. M., Diekmann, H. and Fischer, D.** (2017). Microglia Are Irrelevant for  
515 Neuronal Degeneration and Axon Regeneration after Acute Injury. *J. Neurosci.* **37**,  
516 6113–6124.
- 517 **Huang, Y., Cen, L.-P., Choy, K. W., van Rooijen, N., Wang, N., Pang, C. P. and Cui,**  
518 **Q.** (2007). JAK/STAT pathway mediates retinal ganglion cell survival after acute  
519 ocular hypertension but not under normal conditions. *Exp. Eye Res.* **85**, 684–695.
- 520 **Huang, T., Li, H., Zhang, S., Liu, F., Wang, D. and Xu, J.** (2021). Nrn1  
521 Overexpression Attenuates Retinal Ganglion Cell Apoptosis, Promotes Axonal  
522 Regeneration, and Improves Visual Function Following Optic Nerve Crush in Rats.  
523 *Journal of Molecular Neuroscience* **71**, 66–79.
- 524 **Jovanovic, J., Liu, X., Kokona, D., Zinkernagel, M. S. and Ebnetter, A.** (2020).  
525 Inhibition of inflammatory cells delays retinal degeneration in experimental retinal  
526 vein occlusion in mice. *Glia* **68**, 574–588.
- 527 **Kadye, R., Stoffels, M., Fanucci, S., Mbanxa, S. and Prinsloo, E.** (2020). A STAT3 of  
528 Addiction: Adipose Tissue, Adipocytokine Signalling and STAT3 as Mediators of  
529 Metabolic Remodelling in the Tumour Microenvironment. *Cells* **9**, 1043.  
530 doi:10.3390/cells9041043.
- 531 **Kanagaraj, P., Chen, J. Y., Skaggs, K., Qadeer, Y., Conner, M., Cutler, N.,**  
532 **Richmond, J., Kommidi, V., Poles, A., Affrunti, D., et al.** (2020). Microglia  
533 Stimulate Zebrafish Brain Repair Via a Specific Inflammatory Cascade. *Cold Spring*  
534 *Harbor Laboratory* 2020.10.08.330662.
- 535 **Karlstetter, M., Scholz, R., Rutar, M., Wong, W. T., Provis, J. M. and Langmann, T.**  
536 (2015). Retinal microglia: just bystander or target for therapy? *Prog. Retin. Eye*  
537 *Res.* **45**, 30–57.
- 538 **Kassen, S. C., Thummel, R., Campochiaro, L. A., Harding, M. J., Bennett, N. A. and**  
539 **Hyde, D. R.** (2009). CNTF induces photoreceptor neuroprotection and Müller glial  
540 cell proliferation through two different signaling pathways in the adult zebrafish  
541 retina. *Exp. Eye Res.* **88**, 1051–1064.
- 542 **Kole, C., Brommer, B., Nakaya, N., Sengupta, M., Bonet-Ponce, L., Zhao, T., Wang,**  
543 **C., Li, W., He, Z. and Tomarev, S.** (2020). Activating Transcription Factor 3 (ATF3)  
544 Protects Retinal Ganglion Cells and Promotes Functional Preservation After Optic  
545 Nerve Crush. *Invest. Ophthalmol. Vis. Sci.* **61**, 31. doi:10.1167/iov.61.2.31
- 546 **Kölsch, Y., Hahn, J., Sappington, A., Stemmer, M., Fernandes, A. M., Helmbrecht,**  
547 **T. O., Lele, S., Butrus, S., Laurell, E., Arnold-Ammer, I., et al.** (2021). Molecular  
548 classification of zebrafish retinal ganglion cells links genes to cell types to behavior.  
549 *Neuron* **109**, 645–662.e9.
- 550 **Lahne, M., Nagashima, M., Hyde, D. R. and Hitchcock, P. F.** (2020). Reprogramming  
551 Müller Glia to Regenerate Retinal Neurons. *Annu Rev Vis Sci* **6**, 171–193.

- 552 **Langevin, C., Aleksejeva, E., Passoni, G., Palha, N., Levraud, J.-P. and Boudinot,**  
553 **P. (2013).** The antiviral innate immune response in fish: evolution and conservation  
554 of the IFN system. *J. Mol. Biol.* **425**, 4904–4920.
- 555 **Larison, K. D. and Bremiller, R. (1990).** Early onset of phenotype and cell patterning in  
556 the embryonic zebrafish retina. *Development* **109**, 567–576.
- 557 **Leach, L. L., Hanovice, N. J., George, S. M., Gabriel, A. E. and Gross, J. M. (2020).**  
558 The immune response is a critical regulator of zebrafish retinal pigment epithelium  
559 regeneration. *bioRxiv* 2020.08.14.250043.
- 560 **Leibinger, M., Andreadaki, A., Diekmann, H. and Fischer, D. (2013).** Neuronal  
561 STAT3 activation is essential for CNTF- and inflammatory stimulation-induced CNS  
562 axon regeneration. *Cell Death & Disease* **4**, e805–e805.
- 563 **Li, L., Huang, H., Fang, F., Liu, L., Sun, Y. and Hu, Y. (2020).** Longitudinal  
564 Morphological and Functional Assessment of RGC Neurodegeneration After Optic  
565 Nerve Crush in Mouse. *Front. Cell. Neurosci.* **14**, 109.  
566 doi:10.3389/fncel.2020.00109
- 567 **Lin, H., Lee, E., Hestir, K., Leo, C., Huang, M., Bosch, E., Halenbeck, R., Wu, G.,**  
568 **Zhou, A., Behrens, D., et al. (2008).** Discovery of a cytokine and its receptor by  
569 functional screening of the extracellular proteome. *Science* **320**, 807–811.
- 570 **Luo, J.-M., Cen, L.-P., Zhang, X.-M., Chiang, S. W.-Y., Huang, Y., Lin, D., Fan, Y.-M.,**  
571 **Van Rooijen, N., Lam, D. S. C., Pang, C. P., et al. (2007).** PI3K/akt, JAK/STAT  
572 and MEK/ERK pathway inhibition protects retinal ganglion cells via different  
573 mechanisms after optic nerve injury. *European Journal of Neuroscience* **26**, 828–  
574 842.
- 575 **Luo, X., Ribeiro, M., Bray, E. R., Lee, D.-H., Yungker, B. J., Mehta, S. T., Thakor, K.**  
576 **A., Diaz, F., Lee, J. K., Moraes, C. T., et al. (2016).** Enhanced Transcriptional  
577 Activity and Mitochondrial Localization of STAT3 Co-induce Axon Regrowth in the  
578 Adult Central Nervous System. *Cell Rep.* **15**, 398–410.
- 579 **Mac Nair, C. E., Schlamp, C. L., Montgomery, A. D., Shestopalov, V. I. and**  
580 **Nickells, R. W. (2016).** Retinal glial responses to optic nerve crush are attenuated  
581 in Bax-deficient mice and modulated by purinergic signaling pathways. *J.*  
582 *Neuroinflammation* **13**, 93. <https://doi.org/10.1186/s12974-016-0558-y>
- 583 **Mehta, S. T., Luo, X., Park, K. K., Bixby, J. L. and Lemmon, V. P. (2016).**  
584 Hyperactivated Stat3 boosts axon regeneration in the CNS. *Exp. Neurol.* **280**, 115–  
585 120.
- 586 **Mitchell, D. M., Lovel, A. G. and Stenkamp, D. L. (2018).** Dynamic changes in  
587 microglial and macrophage characteristics during degeneration and regeneration of  
588 the zebrafish retina. *J. Neuroinflammation* **15**, 163. [https://doi.org/10.1186/s12974-](https://doi.org/10.1186/s12974-018-1185-6)  
589 [018-1185-6](https://doi.org/10.1186/s12974-018-1185-6)

- 590 **Nadal-Nicolás, F. M., Jiménez-López, M., Salinas-Navarro, M., Sobrado-Calvo, P.,**  
591 **Vidal-Sanz, M. and Agudo-Barriuso, M.** (2017). Microglial dynamics after  
592 axotomy-induced retinal ganglion cell death. *J. Neuroinflammation* **14**, 218.  
593 <https://doi.org/10.1186/s12974-017-0982-7>
- 594 **Osborne, A., Khatib, T. Z., Songra, L., Barber, A. C., Hall, K., Kong, G. Y. X.,**  
595 **Widdowson, P. S. and Martin, K. R.** (2018). Neuroprotection of retinal ganglion  
596 cells by a novel gene therapy construct that achieves sustained enhancement of  
597 brain-derived neurotrophic factor/tropomyosin-related kinase receptor-B signaling.  
598 *Cell Death Dis.* **9**, 1007. <https://doi.org/10.1038/s41419-018-1041-8>
- 599 **Park, K. K., Luo, X., Mooney, S. J., Yungher, B. J., Belin, S., Wang, C., Holmes, M.**  
600 **M. and He, Z.** (2017). Retinal ganglion cell survival and axon regeneration after  
601 optic nerve injury in naked mole-rats. *J. Comp. Neurol.* **525**, 380–388.
- 602 **Park, K., Luo, J.-M., Hisheh, S., Harvey, A. R. and Cui, Q.** (2004). Cellular  
603 mechanisms associated with spontaneous and ciliary neurotrophic factor-cAMP-  
604 induced survival and axonal regeneration of adult retinal ganglion cells. *J. Neurosci.*  
605 **24**, 10806–10815.
- 606 **Pereiro, X., Ruzafa, N., Acera, A., Fonollosa, A., Rodriguez, F. D. and Vecino, E.**  
607 (2018). Dexamethasone protects retinal ganglion cells but not Müller glia against  
608 hyperglycemia in vitro. *PLoS One* **13**, e0207913.
- 609 **Pittman, A. J., Law, M.-Y. and Chien, C.-B.** (2008). Pathfinding in a large vertebrate  
610 axon tract: isotypic interactions guide retinotectal axons at multiple choice points.  
611 *Development* **135**, 2865–2871.
- 612 **Rashid, K., Akhtar-Schaefer, I. and Langmann, T.** (2019). Microglia in Retinal  
613 Degeneration. *Front. Immunol.* **10**, 1975. doi: 10.3389/fimmu.2019.01975.
- 614 **Sappington, R. M., Chan, M. and Calkins, D. J.** (2006). Interleukin-6 protects retinal  
615 ganglion cells from pressure-induced death. *Invest. Ophthalmol. Vis. Sci.* **47**, 2932–  
616 2942.
- 617 **Selvaraj, B. T., Frank, N., Bender, F. L. P., Asan, E. and Sendtner, M.** (2012). Local  
618 axonal function of STAT3 rescues axon degeneration in the pmn model of  
619 motoneuron disease. *J. Cell Biol.* **199**, 437–451.
- 620 **Shen, S., Niso-Santano, M., Adjemian, S., Takehara, T., Malik, S. A., Minoux, H.,**  
621 **Souquere, S., Mariño, G., Lachkar, S., Senovilla, L., et al.** (2012). Cytoplasmic  
622 STAT3 represses autophagy by inhibiting PKR activity. *Mol. Cell* **48**, 667–680.
- 623 **Sherr, C. J., Rettenmier, C. W., Sacca, R., Roussel, M. F., Look, A. T. and Stanley,**  
624 **E. R.** (1985). The c-fms proto-oncogene product is related to the receptor for the  
625 mononuclear phagocyte growth factor, CSF-1. *Cell* **41**, 665–676.
- 626 **Syc-Mazurek, S. B. and Libby, R. T.** (2019). Axon injury signaling and



- 627 compartmentalized injury response in glaucoma. *Prog. Retin. Eye Res.* **73**, 100769.  
628 doi:10.1016/j.preteyeres.2019.07.002
- 629 **Takeda, A., Shinozaki, Y., Kashiwagi, K., Ohno, N., eto, K., Wake, H., Nabekura, J.**  
630 **and Koizumi, S.** (2018). Microglia mediate non-cell-autonomous cell death of  
631 retinal ganglion cells. *Glia* **66**, 2366–2384.
- 632 **Todd, L., Squires, N., Suarez, L. and Fischer, A. J.** (2016). Jak/Stat signaling  
633 regulates the proliferation and neurogenic potential of Müller glia-derived progenitor  
634 cells in the avian retina. *Sci. Rep.* **6**, 35703. <https://doi.org/10.1038/srep35703>
- 635 **Todd, L., Palazzo, I., Suarez, L., Liu, X., Volkov, L., Hoang, T. V., Campbell, W. A.,**  
636 **Blackshaw, S., Quan, N. and Fischer, A. J.** (2019). Reactive microglia and  
637 IL1 $\beta$ /IL-1R1-signaling mediate neuroprotection in excitotoxin-damaged mouse  
638 retina. *J. Neuroinflammation* **16**, 118. <https://doi.org/10.1186/s12974-019-1505-5>
- 639 **Tran, N. M., Shekhar, K., Whitney, I. E., Jacobi, A., Benhar, I., Hong, G., Yan, W.,**  
640 **Adiconis, X., Arnold, M. E., Lee, J. M., et al.** (2019). Single-Cell Profiles of Retinal  
641 Ganglion Cells Differing in Resilience to Injury Reveal Neuroprotective Genes.  
642 *Neuron* **104**, 1039–1055.e12.
- 643 **Tsarouchas, T. M., Wehner, D., Cavone, L., Munir, T., Keatinge, M., Lambertus, M.,**  
644 **Underhill, A., Barrett, T., Kassapis, E., Ogryzko, N., et al.** (2018). Dynamic  
645 control of proinflammatory cytokines Il-1 $\beta$  and Tnf- $\alpha$  by macrophages in zebrafish  
646 spinal cord regeneration. *Nature Communications* **9**,4670  
647 <https://doi.org/10.1038/s41467-018-07036-w>.
- 648 **Uribe, R. A. and Gross, J. M.** (2007). Immunohistochemistry on cryosections from  
649 embryonic and adult zebrafish eyes. *CSH Protoc.* **2007**, db.prot4779.
- 650 **Van Dyck, A., Bollaerts, I., Beckers, A., Vanhunsel, S., Glorian, N., van Houcke, J.,**  
651 **van Ham, T. J., De Groef, L., Andries, L. and Moons, L.** (2021). Müller glia-  
652 myeloid cell crosstalk accelerates optic nerve regeneration in the adult zebrafish.  
653 *Glia*. doi:10.1002/glia.23972
- 654 **Villarino, A. V., Kanno, Y., Ferdinand, J. R. and O’Shea, J. J.** (2015). Mechanisms of  
655 Jak/STAT signaling in immunity and disease. *J. Immunol.* **194**, 21–27.
- 656 **Warchol, M. E.** (1999). Immune cytokines and dexamethasone influence sensory  
657 regeneration in the avian vestibular periphery. *J. Neurocytol.* **28**, 889–900.
- 658 **White, D. T., Sengupta, S., Saxena, M. T., Xu, Q., Hanes, J., Ding, D., Ji, H. and**  
659 **Mumm, J. S.** (2017). Immunomodulation-accelerated neuronal regeneration  
660 following selective rod photoreceptor cell ablation in the zebrafish retina. *Proc. Natl.*  
661 *Acad. Sci. U. S. A.* **114**, E3719–E3728.
- 662 **Williams, P. A., Marsh-Armstrong, N., Howell, G. R. and Lasker/IRRF Initiative on**  
663 **Astrocytes and Glaucomatous Neurodegeneration Participants** (2017).

- 664 Neuroinflammation in glaucoma: A new opportunity. *Exp. Eye Res.* **157**, 20–27.
- 665 **Xie, Y., Tolmeijer, S., Oskam, J. M., Tonkens, T., Meijer, A. H. and Schaaf, M. J. M.**  
666 (2019). Glucocorticoids inhibit macrophage differentiation towards a pro-  
667 inflammatory phenotype upon wounding without affecting their migration. *Dis.*  
668 *Model. Mech.* **12**, dmm037887. doi: 10.1242/dmm.037887.
- 669 **Zhang, C., Li, H., Liu, M.-G., Kawasaki, A., Fu, X.-Y., Barnstable, C. J. and Shao-**  
670 **Min Zhang, S.** (2008). STAT3 activation protects retinal ganglion cell layer neurons  
671 in response to stress. *Exp. Eye Res.* **86**, 991–997.
- 672 **Zhao, X.-F., Wan, J., Powell, C., Ramachandran, R., Myers, M. G., Jr and Goldman,**  
673 **D.** (2014). Leptin and IL-6 family cytokines synergize to stimulate Müller glia  
674 reprogramming and retina regeneration. *Cell Rep.* **9**, 272–284.
- 675 **Zou, S., Tian, C., Ge, S. and Hu, B.** (2013). Neurogenesis of retinal ganglion cells is  
676 not essential to visual functional recovery after optic nerve injury in adult zebrafish.  
677 *PLoS One* **8**, e57280.



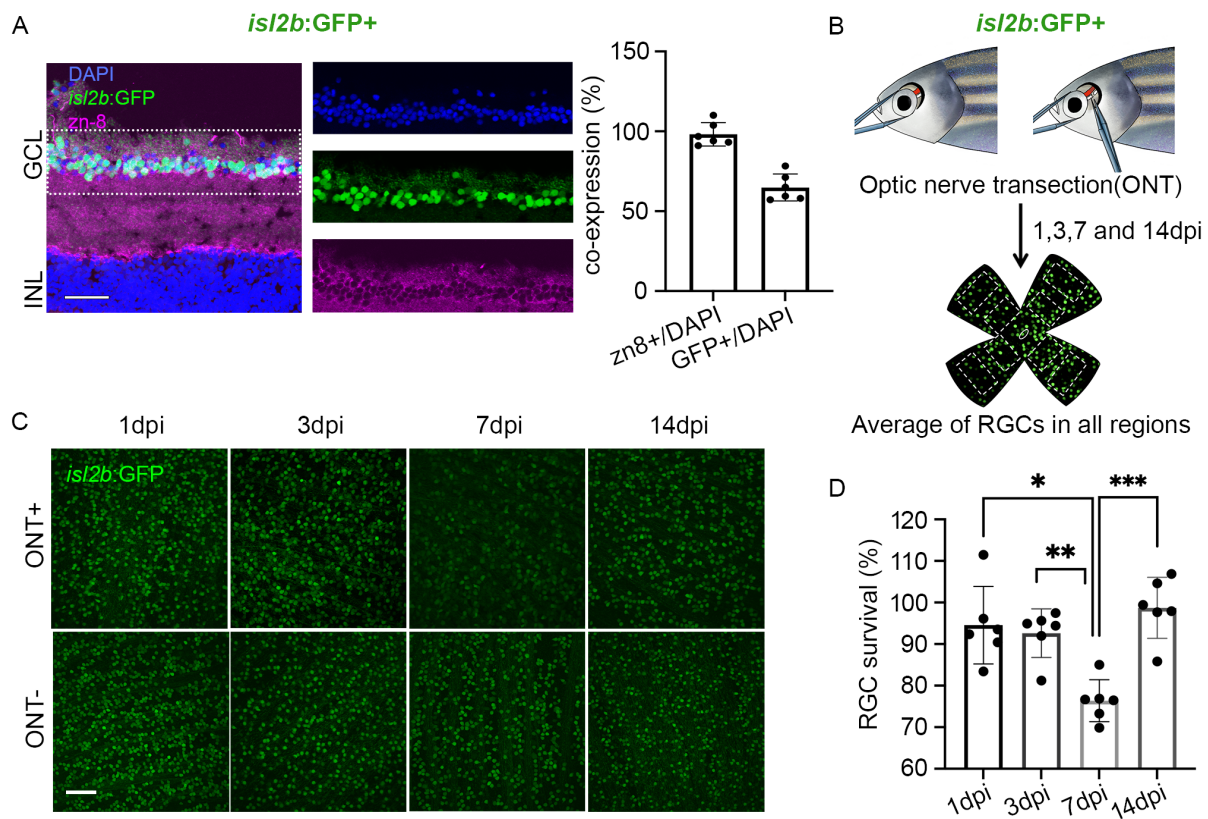

### Figure1: Zebrafish RGCs are preserved after ONT

**(A)** Immunolabeling of RGCs in the ganglion cell layer (GCL) with zn-8 (magenta) in the adult *is/2b:GFP* (green) retinae. ~65% of DAPI (blue) stained RGCs were *is/2b:GFP*<sup>+</sup>. **(B)** Overview of optic nerve transection (ONT) and RGC survival analyses. **(C)** Images of 1, 3, 7, and 14dpi flat-mount retinae. **(D)** RGC survival percentages at 1, 3, 7, and 14dpi (n=6/day). Shown are mean±SD; \*p<0.05; \*\*p<0.01; \*\*\*p<0.001; Kruskal Wallis ANOVA w/ Dunn's multiple comparisons. Scale bars = 50µm.

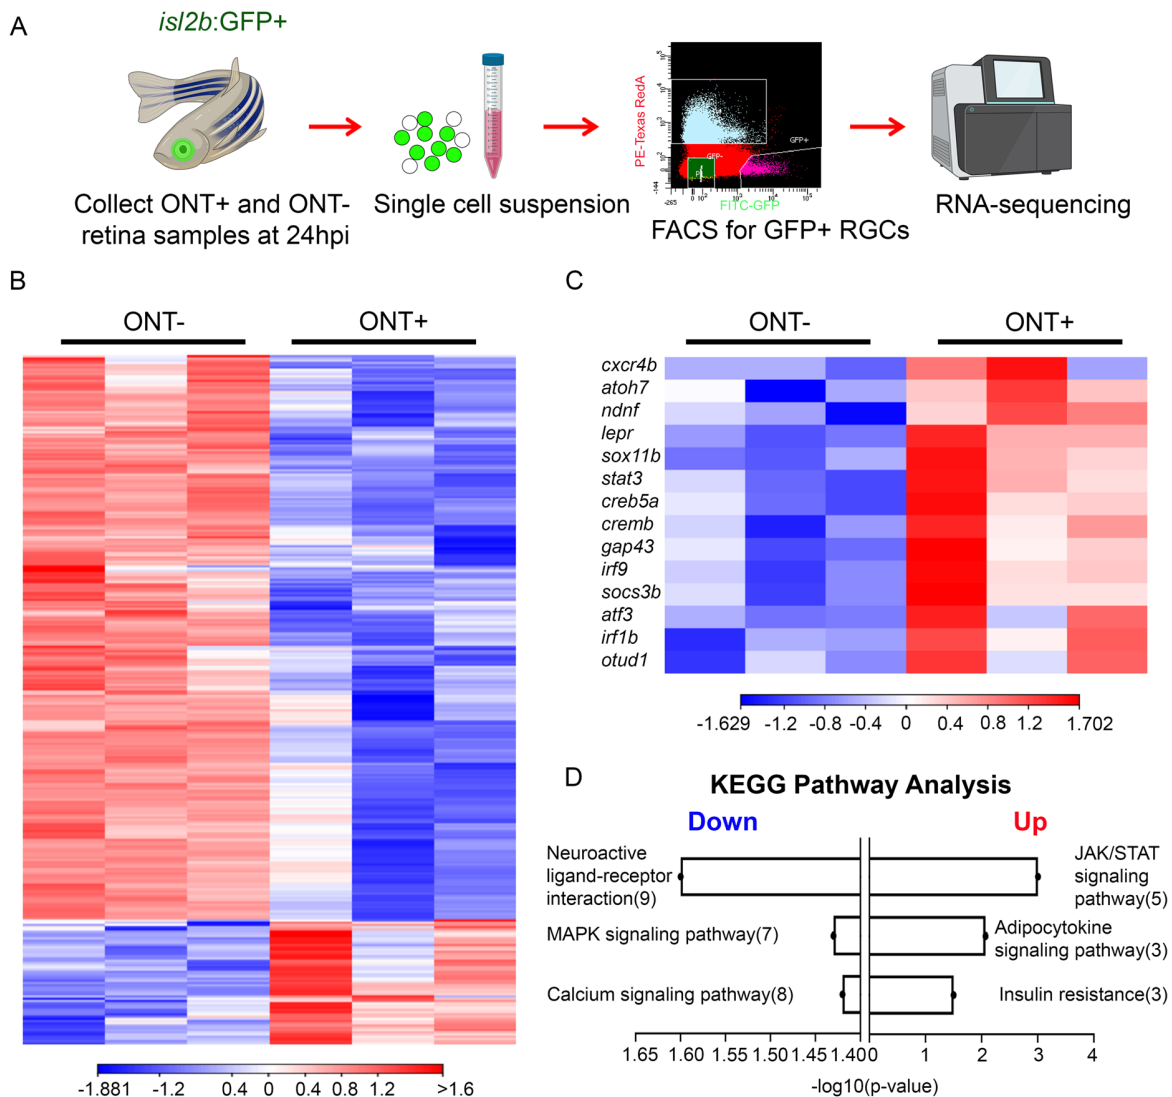

**Figure 2: Identification of differentially expressed genes in *isl2b:GFP+* RGCs after ONT.**

**(A)** Experimental workflow for FACS-isolation of *isl2b:GFP+* RGCs. An example FACS plot showing a cell sorting gate is included. Icons were adapted from [BioRender.com](https://www.biorender.com/). **(B)** Heatmap showing hierarchical clustering of 308 DEGs at 24hpi from three biological replicates. **(C)** Heatmap highlighting DEGs of interest based on known neuroprotective and pro-regenerative functions. Heatmap legends show  $\log_2$ TPM. **(D)** Pathway enrichment analysis using the KEGG database showing top-3 down- and up-regulated pathways after ONT.

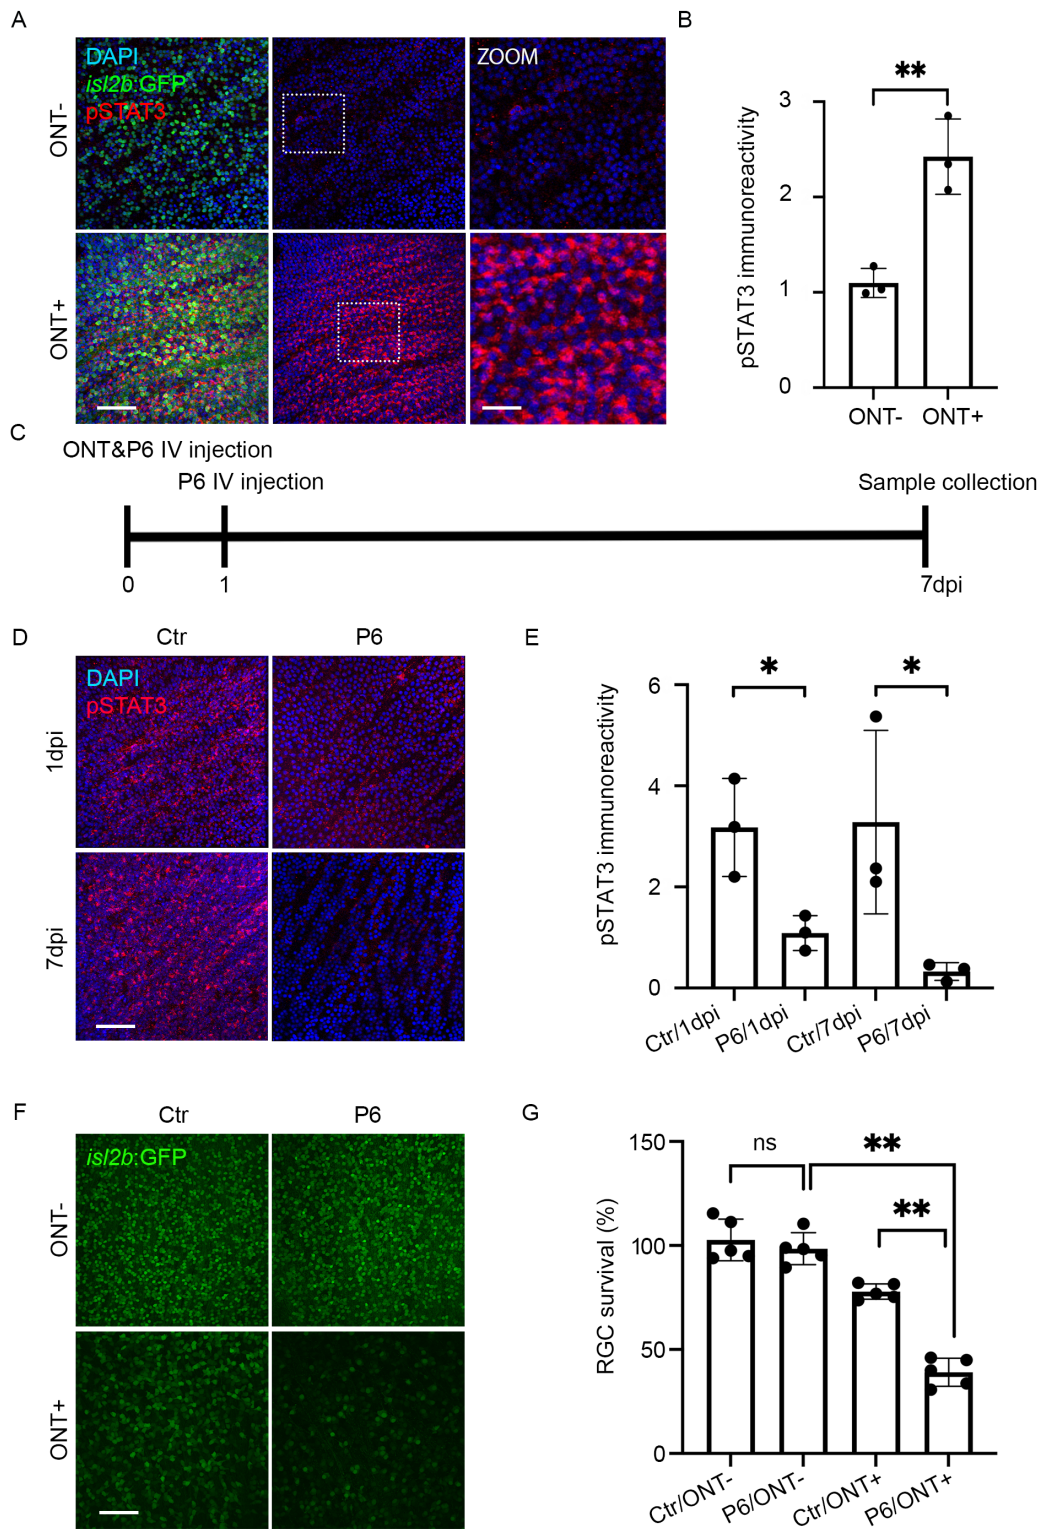

### **Figure 3: JAK/STAT pathway activity is required for RGC survival after ONT**

**(A)** pSTAT3 expression (red) in flat-mount *is/2b*:GFP ONT- and ONT+ retinae at 1dpi. Nuclei stained with DAPI (blue). Boxed regions are 3x zooms of 40x images. **(B)** Quantification of pSTAT3 levels at 1dpi. pSTAT3 levels in ONT+ RGCs relative to levels normalized to those in ONT- RGCs. Shown are mean $\pm$ SD of n=3 for each group; \*\*p<0.01; Mann-Whitney test. **(C)** Experimental paradigm to assess Jak requirement during RGC survival after ONT. **(D)** pSTAT3 expression in ONT+ *is/2b*:GFP retinal flat mounts at 1 and 7dpi +/- intravitreal (IV) injection of the Jak inhibitor, P6. DMSO was used as control (Ctr). **(E)** Quantification of pSTAT3 expression after P6 application at 1 and 7dpi. N=3/condition. Shown are mean $\pm$ SD; \*p<0.05, Mann-Whitney test. **(F)** Images of 7dpi P6- or DMSO-injected flat-mount *is/2b*:GFP retinae. **(G)** Quantification of RGC survival after P6 injection (n=5/condition). Shown are mean $\pm$ SD; \*\*p<0.01; Kruskal Wallis ANOVA with Dunn's multiple comparisons. Scale bars = 50 $\mu$ m and 150 $\mu$ m on zoomed images in A.

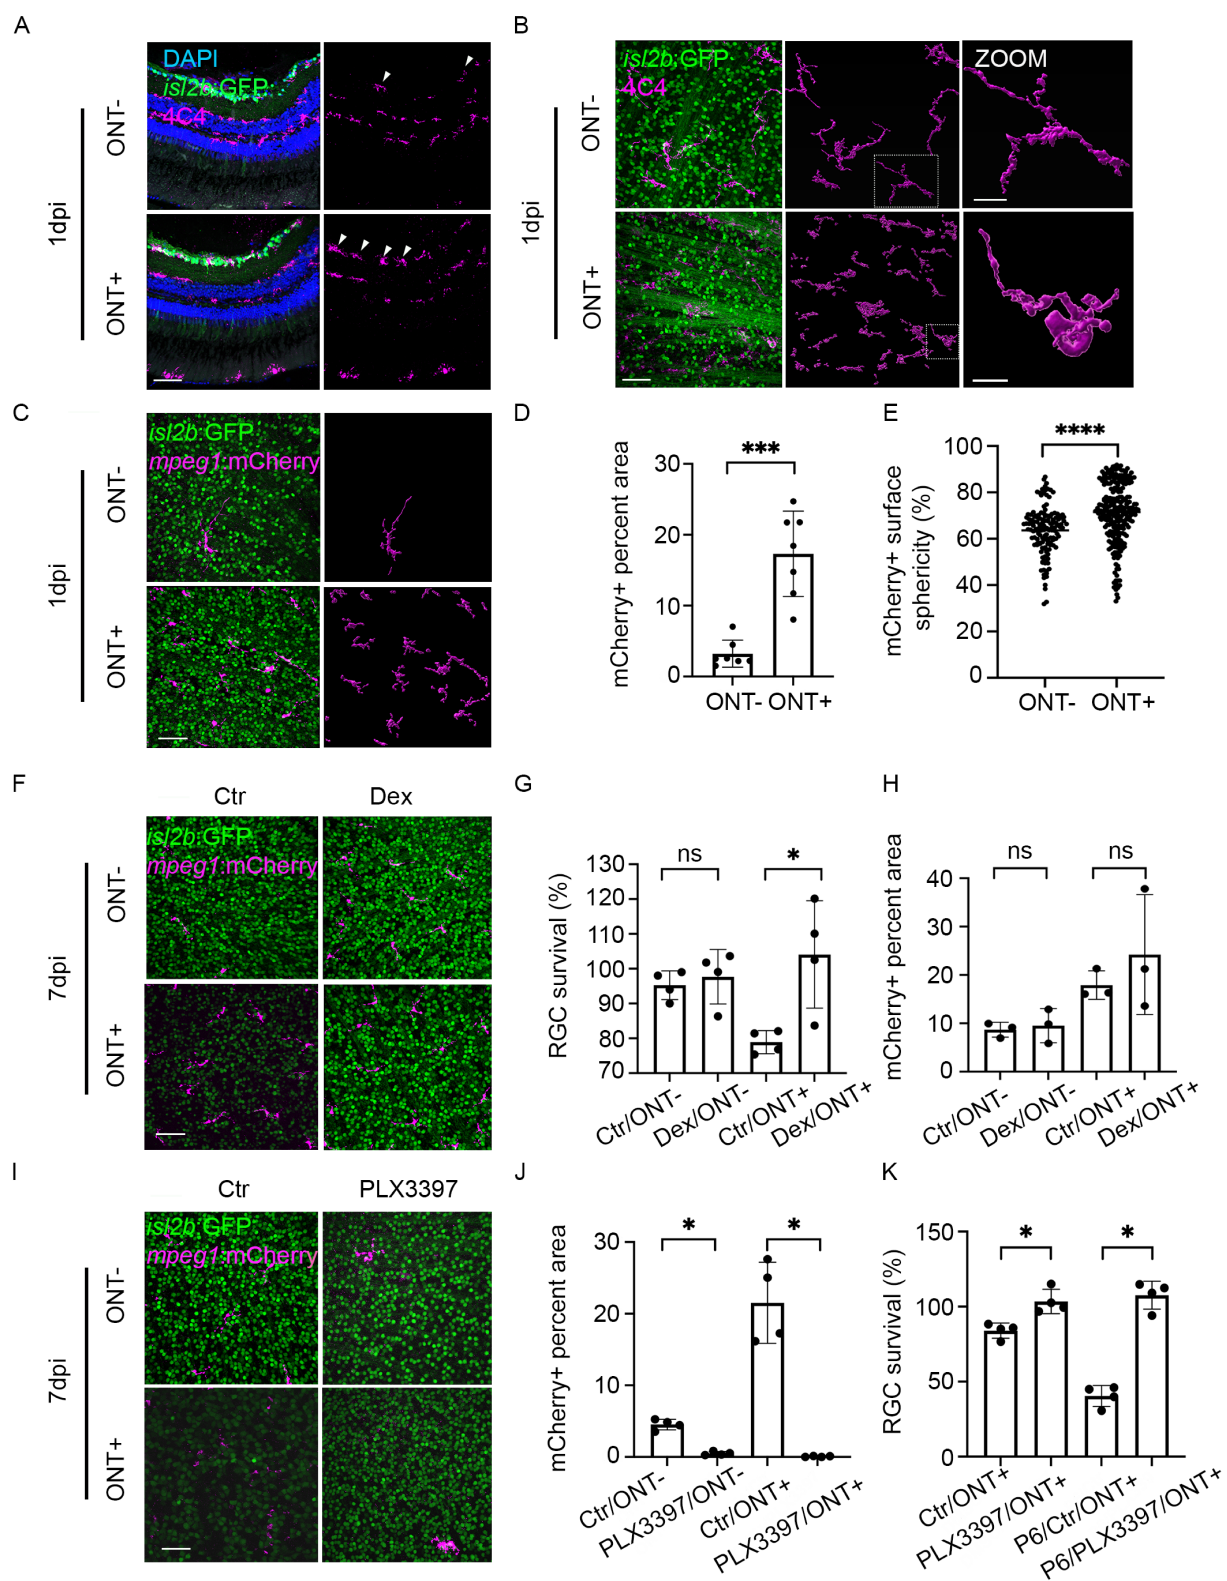



## **Figure 4: Macrophages/microglia are recruited to the GCL after ONT and mediate RGC death**

Immunostaining of 4C4 (magenta) on *isl2b*:GFP retinal cryosections **(A)** and retinal flat mounts at 1dpi with Imaris surface renderings of 4C4<sup>+</sup> macrophages/microglia **(B)**. **(C)** Images of 1dpi retinal flat-mounts from *isl2b*:GFP;*mpeg1*:mCherry animals; macrophages/microglia (magenta). **(D)** Quantification of the GCL surface area occupied by mCherry<sup>+</sup> macrophages/microglia at 1dpi (n=4/condition). Shown are mean±SD; \*\*\*p<0.001; Mann-Whitney test. **(E)** Violin plot showing a significant increase in sphericity of mCherry<sup>+</sup> macrophages/microglia in ONT+ retinae compared to ONT- controls (n=140 in ONT- and n=272 in ONT+). \*\*\*\*p<0.0001; unpaired t-test with Welch's correction. **(F)** Flat-mount images of *isl2b*:GFP;*mpeg1*:mCherry retinae after intravitreal injection of dexamethasone (Dex) or DMSO (Ctr) at 7dpi. **(G)** RGC survival in dexamethasone-treated retinae increased significantly at 7dpi when compared to control (n=4/condition). Shown are mean±SD; \*p<0.05; Kruskal Wallis ANOVA test with Dunn's multiple comparisons. **(H)** Quantification of mCherry<sup>+</sup> macrophage/microglia coverage of the GCL after ONT and dexamethasone or DMSO injection (n=3/condition). Shown are mean±SD; Kruskal Wallis ANOVA test with Dunn's multiple comparisons. No significant differences were detected. **(I)** Flat-mount images of *isl2b*:GFP;*mpeg1*:mCherry retinae after PLX3397 or control treatment (Ctr) at 7dpi. **(J)** Quantification of mCherry<sup>+</sup> macrophage/microglia coverage of the GCL after ONT and PLX3397 treatment (n=4/condition). Shown are mean±SD; \*p<0.05; Kruskal Wallis ANOVA test with Dunn's multiple comparisons. **(K)** RGC survival in PLX3397-treated retinae increased significantly at 7dpi when compared to control. Similarly, RGC survival in PLX3397-treated retinae increased significantly after P6 addition over DMSO controls (n=4/condition). Shown are mean±SD; \*P<0.05; Mann-Whitney test. Scale bars = 50µm.
